# Supplementary material for: Enhancing Type 2 Diabetes Prediction through Transfer Learning: A Framework for Utilizing Unpaired Clinical and Genetic Data
Source: Research Square preprint supplement (doi:10.21203/rs.3.rs-6208543/v1), 2025-03-24
Supplement: Supplementary file 1 [file c2715ab0c4ba3128864ebe7a.docx]

Supp table1. 110 SNPs related to type 2 diabetes.

| **No.** | **rs_ID** | **Gene** | **Minor** | **Major** | **Risk allele** | **No.** | **rs_ID** | **Gene** | **Minor** | **Major** | **Risk allele** |
| --- | --- | --- | --- | --- | --- | --- | --- | --- | --- | --- | --- |
| **1** | rs16826069 | MACF1 | G | A | G | **56** | rs13292136 | CHCHD2P9, KRT18P24 | T | C | T |
| **2** | rs2296172 | MACF1 | G | A | G | **57** | rs687621 | ABO | G | A | G |
| **3** | rs2296173 | MACF1 | G | A | G | **58** | rs635634 | Y_RNA, ABO | T | C | T |
| **4** | rs17106184 | FAF1 | A | G | A | **59** | rs3118470 | IL2RA | T | C | C |
| **5** | rs3176466 | CDKN2C | T | C | C | **60** | rs75872811 | ARID5B | G | A | G |
| **6** | rs72906810 | MIR4421, CDKN2C | G | A | G | **61** | rs1236816 | PTEN | A | C | A |
| **7** | rs7531962 | CHD1L, LINC00624 | A | G | A | **62** | rs7081841 | TCF7L2 | G | C | G |
| **8** | rs10305745 | ARNT | A | G | A | **63** | rs10886471 | GRK5 | T | C | C |
| **9** | rs12041243 | MDM4 | G | A | G | **64** | rs7111341 | MIR4686, ASCL2 | T | C | T |
| **10** | rs17045328 | CR2 | G | A | G | **65** | rs163177 | KCNQ1 | C | T | C |
| **11** | rs2820426 | ZC3H11B, LYPLAL1-AS1 | G | A | A | **66** | rs2237892 | KCNQ1 | T | C | T |
| **12** | rs2820444 | ZC3H11B, LYPLAL1-AS1 | A | G | G | **67** | rs2237895 | KCNQ1 | C | A | C |
| **13** | rs7558502 | EPC2 | G | A | G | **68** | rs1061810 | HSD17B12 | A | C | A |
| **14** | rs7578326 | NYAP2,MIR5702 | G | A | G | **69** | rs56200889 | ARAP1 | C | G | G |
| **15** | rs2943640 | NYAP2,MIR5702 | A | C | C | **70** | rs1552224 | ARAP1 | C | A | C |
| **16** | rs2943641 | NYAP2,MIR5702 | T | C | C | **71** | rs10893827 | LINC02725 | G | A | A |
| **17** | rs17819328 | PPARG, TSEN2 | T | G | G | **72** | rs718314 | ITPR2-AS1 | A | G | G |
| **18** | rs17013314 | UBE2E2 | G | A | G | **73** | rs1127787 | MRPS35 | A | G | G |
| **19** | rs10490871 | RNU6-243P,ARPP21 | G | A | G | **74** | rs12304921 | HIGD1C | A | G | G |
| **20** | rs2255703 | PLXND1 | C | T | C | **75** | rs2277339 | PRIM1, HSD17B6 | G | T | G |
| **21** | rs6762208 | SENP2 | A | C | A | **76** | rs11066453 | OAS1 | G | A | G |
| **22** | rs4402960 | IGF2BP2 | T | G | T | **77** | rs10773000 | MTRFR, CDK2AP1 | T | G | G |
| **23** | rs1470579 | IGF2BP2 | C | A | C | **78** | rs9316500 | DLEU1, DLEU7 | T | G | G |
| **24** | rs6769511 | IGF2BP2 | C | T | C | **79** | rs963740 | DLEU1, DLEU7 | A | T | A |
| **25** | rs1374910 | IGF2BP2 | T | C | T | **80** | rs9555581 | LINC00370 | T | C | C |
| **26** | rs16902871 | RANBP3L | G | A | G | **81** | rs730570 | DLK1, LINC00523 | A | G | G |
| **27** | rs2307111 | POC5 | T | C | C | **82** | rs3825801 | MYO5C | T | C | C |
| **28** | rs9295474 | CDKAL1 | G | C | G | **83** | rs4502156 | NPM1P47, C2CD4B | T | C | C |
| **29** | rs4712523 | CDKAL1 | G | A | G | **84** | rs7172432 | NPM1P47, C2CD4B | G | A | G |
| **30** | rs4712524 | CDKAL1 | G | A | G | **85** | rs1436955 | NPM1P47, C2CD4B | T | C | C |
| **31** | rs10946398 | CDKAL1 | C | A | C | **86** | rs7178762 | USP3-AS1, USP3 | T | C | C |
| **32** | rs7754840 | CDKAL1 | C | G | C | **87** | rs7178572 | HMG20A | G | A | G |
| **33** | rs7756992 | CDKAL1 | A | G | G | **88** | rs7119 | HMG20A | T | C | T |
| **34** | rs9368222 | CDKAL1 | A | C | A | **89** | rs7177055 | HMG20A, LINGO1 | A | G | G |
| **35** | rs9465871 | CDKAL1 | T | C | C | **90** | rs2028299 | AP3S2 | C | A | A |
| **36** | rs3869115 | HLA-C, HCG27 | G | C | G | **91** | rs10852123 | AP3S2, ARPIN-AP3S2 | A | C | A |
| **37** | rs3130283 | AGPAT1, PPT2EGFL8 | A | C | C | **92** | rs6416749 | ZFHX3 | C | T | C |
| **38** | rs1063355 | HLA-DQB1, HLA-DQB1-AS1 | T | G | T | **93** | rs2925979 | CMIP | T | C | C |
| **39** | rs9275184 | HLA-DQB1,MTCO3P1 | C | T | C | **94** | rs1043246 | ATP2A3 | G | C | G |
| **40** | rs3916765 | MTCO3P1,HLA-DQB3 | A | G | A | **95** | rs781831 | ZZEF1 | C | T | C |
| **41** | rs9296095 | BAK1,GGNBP1 | C | T | C | **96** | rs781852 | ZZEF1 | G | A | G |
| **42** | rs75080135 | GGNBP1 | C | A | C | **97** | rs75418188 | SLC16A11 | T | C | T |
| **43** | rs9470794 | ZFAND3 | C | T | C | **98** | rs475002 | SNAPC2 | C | G | G |
| **44** | rs4711750 | LINC02537, VEGFA | T | A | A | **99** | rs58542926 | TM6SF2 | T | C | C |
| **45** | rs6905288 | VEGFA, LINC02537 | G | A | A | **100** | rs472265 | ACP7 | G | A | G |
| **46** | rs9472138 | VEGFA, LINC02537 | T | C | T | **101** | rs1871045 | NECTIN2, BCAM | T | C | T |
| **47** | rs1048886 | SDHAF4 | G | A | G | **102** | rs429358 | APOE | C | T | T |
| **48** | rs4273712 | PRELID1P1, YAP1P3 | G | A | G | **103** | rs4420638 | APOC1, APOC1P1 | G | A | G |
| **49** | rs2908334 | AGMO, GTF3AP5 | C | T | T | **104** | rs10408179 | RN7SL836P, GIPR | C | T | C |
| **50** | rs583769 | HDAC9 | A | G | G | **105** | rs1800437 | GIPR | C | G | C |
| **51** | rs730497 | GCK | A | G | G | **106** | rs3810291 | ZC3H4 | A | G | A |
| **52** | rs4607517 | GCK | A | G | A | **107** | rs2252221 | TSHZ2 | A | G | G |
| **53** | rs35452727 | CAMK2B | T | C | T | **108** | rs2833610 | HUNK | G | A | A |
| **54** | rs2268382 | CPA1 | C | A | C | **109** | rs4077129 | PIM3 | T | C | T |
| **55** | rs13292262 | CHCHD2P9, KRT18P24 | C | T | T | **110** | rs5771069 | IL17REL | G | A | G |

Supple table 2. Average test-set performance (balanced accuracy and AUC) over 100 iterations for different data imbalance mitigation strategies.

| **Model** | **Balanced accuracy** | **AUC** |
| --- | --- | --- |
| **standard BCE** | 0.5496(0.0337) | 0.8161(0.005) |
| **pw_BCE** | 0.7493(0.0066) | 0.8272(0.0048) |
| **WRS** | 0.7658(0.0064) | 0.8435(0.0044) |
| **pw_BCE+WRS** | **0.7665(0.0068)** | **0.8442(0.0045)** |

Supp table2. Setting hyperparameters for DNN model performance comparison: Addressing imbalanced data problem.

| **Model metric** | **Layer number** | **Learning rate** | **Batch size** | **Loss function** | | **Positive weight value** | | **WRS** | |
| --- | --- | --- | --- | --- | --- | --- | --- | --- | --- |
| **Standard BCE** | 3 | 1e-04 | 1024 | | BCE | | - | | - | |
| **pw_BCE** | 3 | 1e-04 | 1024 | | BCE | | 15 | | - | |
| **WRS** | 3 | 1e-04 | 1024 | | BCE | | - | | O | |
| **pw_BCE+WRS** | 3 | 1e-04 | 1024 | | BCE | | 1.1 | | O | |

Supp table 3. Performance comparison of different model types (DNN, intermediate fusion, transfer learning) over 100 repeated runs.

| **Model** | **Balanced accuracy** | **AUC** |
| --- | --- | --- |
| **DNN** | 0.7665(0.0068) | 0.8442(0.0045) |
| **Intermediate fusion** | 0.7759(0.0278) | 0.8664(0.0029) |
| **Transfer learning** | **0.7928(0.012)** | **0.8699(0.0009)** |

Supp table3. Setting hyperparameters to compare DNN model, intermediate fusion model and transfer learning model.

| **Model metric** | **Layer number** | **Learning rate** | **Batch size** | **Positive weight value** | **Drop-out** | **Weight decay** |
| --- | --- | --- | --- | --- | --- | --- |
| **DNN** | 3 | 1e-04 | 1024 | 1.1 | - | - | |
| **Intermediate fusion** | Clinical layer : 3  SNP layer : 19  Total layer : 19 | 1e-04 | 1024 | 1.2 | 0.1 | 0.5 | |
| **Transfer learning** | Pre-training layer : 3  Clinical layer : 3  SNP layer : 19  Total layer : 19 | Pre-training :  1e-01  Main-training :  1e-04 | Pre-training :  512  Main-training :  128 | Main-training :  1.7 | 0.5 | Pre-training :  1e-02  Main-training :  1e-03 | |
